# Supplementary material for: Timescale dependence of environmental controls on methane efflux from Poyang Hu, China
Source: Copernicus journal article supplement (doi:10.5194/bg-14-2019-2017), 2017-04-18
Supplement: Supplementary file 1 [file bg-14-2019-2017-supplement.zip]

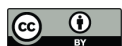

## *Supplement of*

# **Timescale dependence of environmental controls on methane efflux from Poyang Hu, China**

**Lixiang Liu et al.**

*Correspondence to:* Ming Xu (mingxu@igsnr.ac.cn)

- bg-14-2019-2017-supplement-title-page.pdf
- Supplementary material.pdf
- data 4.9.xlsx

The copyright of individual parts of the supplement might differ from the CC-BY 3.0 licence.
