# Supplementary material for: Timescale dependence of environmental controls on methane efflux from Poyang Hu, China
Source: Copernicus journal article supplement (doi:10.5194/bg-14-2019-2017), 2017-04-18
Supplement: Supplementary file 1 [file data 4.9.xlsx]

## Sheet: Seasonal CH4 efflux
Year	Month	CH4 efflux (mmolm-2day-1)
2011	Jan	0.108233
	Feb	0.126084
	Mar	0.221417
	Apr	0.184715
	May	0.256003
	Jun	0.994982
	Jul	1.60569
	Aug	1.41098
	Sep	0.276083
	Oct	0.316371
	Nev	0.0975542
	Dec	0.0985565
2012	Jan	0.24243
	Feb	0.262449
	Mar	0.297622
	Apr	0.314142
	May	0.463415
	Jun	1.21388
	Jul	1.36855
	Aug	1.05625
	Sep	0.57418
	Oct	0.426781
	Nev	0.284792
	Dec	0.192465
2013	Jan	0.0870394
	Feb	0.165897
	Mar	0.109875
	Apr	0.178235
	May	0.411981
	Jun	1.24444
	Jul	1.84527
	Aug	0.994257
	Sep	0.466301
	Oct	0.297501
	Nev	0.224381
	Dec	0.169888
2014	Jan	0.135527
	Feb	0.22267
	Mar	0.281094
	Apr	0.372946
	May	0.447975
	Jun	1.07592
	Jul	1.95714
	Aug	1.29448
	Sep	0.528889
	Oct	0.27464
	Nev	0.221201
	Dec	0.342688

## Sheet: Diurnal data
2011	Flux (mmolm-2h-1)	wind speed		2012	Flux	wind speed (m/s)			2013	Flux	wind speed		2015	Flux	wind speed
08:00:00	0.0256	2.2		08:00:00	0.0251	2.6			08:00:00	0.0027698	0.3		08:00:00	0.0090353	1.7333
10:00:00	0.0459	3.5		10:00:00	0.0444	3.4			10:00:00	0.001939	0		10:00:00	0.0113	2.7
12:00:00	0.1318	4.5		12:00:00	0.1017	3.7			12:00:00	0.0038376	0.4		12:00:00	0.0213	3.0667
14:00:00	0.0909	3.2		14:00:00	0.0587	2.2			14:00:00	0.0025031	0.35		14:00:00	0.0161	3.3
16:00:00	0.0843	2.5		16:00:00	-0.0186	0.5			16:00:00	0.0031468	0.4		16:00:00	0.0176	3.3
18:00:00	0.0683	1.5		18:00:00	0.0195	0.7			18:00:00	0.0026208	0.35		18:00:00	0.0103	1.4667
20:00:00	-0.0117	1.2		20:00:00	0.0311	0.8			20:00:00	0.0052967	1.2		20:00:00	0.01	1.0667
22:00:00	0.0303	2.1		22:00:00	0.02	0.5			22:00:00	0.0025978	0.55		22:00:00	0.0064778	0.6667
1900-01-01	0.0169	1.6		1900-01-01	0.0339	1.9			1900-01-01	0.0031586	0.85		1900-01-01	0.0065466	0.6667
02:00:00	0.0173	1.8		02:00:00	0.0323	1			02:00:00	0.0033898	0.65		02:00:00	0.0057308	0.8333
04:00:00	0.0218	2		04:00:00	0.0117	0.7			04:00:00	0.0074275	0.3		04:00:00	0.0027925	0.2667
06:00:00	0.0235	2.7		06:00:00	0.0181	2			06:00:00	0.0090194	1.7		06:00:00	0.0033052	0
