# Supplementary material for: Timescale dependence of environmental controls on methane efflux from Poyang Hu, China
Source: Copernicus journal article supplement (doi:10.5194/bg-14-2019-2017), 2017-04-18
Supplement: Supplementary file 2 [file bg-14-2019-2017-supplement.zip]

Archive with 3 entries (3 files):
- Supplementary material.pdf
- data 4.9.xlsx
- bg-14-2019-2017-supplement-title-page.pdf
