# Supplementary material for: Timescale dependence of environmental controls on methane efflux from Poyang Hu, China
Source: Copernicus journal article supplement (doi:10.5194/bg-14-2019-2017), 2017-04-18
Supplement: Supplementary file 2 [file bg-14-2019-2017-supplement.zip › Supplementary material.pdf]

# **Timescale dependence of environmental controls on methane efflux in Poyang Lake, China**

**Lixiang Liu, Ming Xu<sup>\*</sup>, Renqiang Li, Rui Shao**

**\*Corresponding author: Ming Xu (mingxu@ igsnrr.ac.cn)**

**This supporting information contains five tables.**

Table S1 Values of environmental variables and their group assignments

| Different groups | Environmental variables        | Mean value |
|------------------|--------------------------------|------------|
| Group 1          | ST (°C)                        | 18.4       |
|                  | SNC (% DW)                     | 0.097      |
|                  | WL (m)                         | 12.3       |
|                  | DOC (mg/L)                     | 3.26       |
|                  | SpH                            | 6.7        |
|                  | W $\text{NH}_4^+$ (mg/L)       | 0.3        |
|                  | W $\text{NO}_3^-$ (mg/L)       | 1.01       |
|                  | S $\text{NH}_4^+$ (mg/kg)      | 17.62      |
|                  | S $\text{NO}_3^-$ (mg/kg)      | 1.97       |
|                  | SOC (% DW)                     | 0.9        |
|                  | C/N ratio                      | 9.3        |
|                  | Wind speed (m/s)               | 2.3        |
| Group 2          | TN (mg/L)                      | 1.94       |
|                  | TP (mg/L)                      | 0.12       |
|                  | COD (mg/L)                     | 2.81       |
|                  | Chl <i>a</i> (mg/L)            | 5.5        |
| Group 3          | DO (mg/L)                      | 6.87       |
|                  | EC ( $\mu\text{S}/\text{cm}$ ) | 152.6      |
|                  | WpH                            | 6.8        |

**Note:** SOC, soil organic carbon; C/N, sediment C/N ratio; WL, water level; EC, water electrical conductivity; ST, sediment temperature; SNC, the sediment total nitrogen content; S $\text{NO}_3^-$ , the sediment  $\text{NO}_3^-$  concentration; S $\text{NH}_4^+$ , sediment  $\text{NH}_4^+$  concentration; DOC, water DOC content; W $\text{NH}_4^+$ , water  $\text{NH}_4^+$  concentration ; W $\text{NO}_3^-$ , water  $\text{NO}_3^-$  concentration; WpH, the pH of water; SpH, the pH of sediment; TN, total nitrogen concentration in the water; TP, total phosphorous content in the water; Chl *a*, chlorophyll *a* content in the water; COD, chemical oxygen demand in the water; DO, dissolved oxygen content in the water.

Table S2 Statistical evaluations of seasonal CH<sub>4</sub> effluxes including fixed and random effects using general linear model.

| Efflux types                       | Different effects | Parameter | F-value | P-value |
|------------------------------------|-------------------|-----------|---------|---------|
| Non-average CH <sub>4</sub> efflux | Fixed effect      | Season    | 31.65   | 0       |
|                                    | Random effect     | Site      | 0.65    | 0.55    |
| Mean CH <sub>4</sub> efflux        | Fixed effect      | Season    | 31.48   | 0       |
|                                    | Random effect     | Site      | 0.65    | 0.56    |

**Note:** Non-average CH<sub>4</sub> efflux means that we don't average the three study sites prior to investigating seasonal variation in CH<sub>4</sub> efflux. Mean CH<sub>4</sub> efflux means that we average the three study sites prior to investigating seasonal variation in CH<sub>4</sub> efflux.

Table S3 Statistical evaluations of diel CH<sub>4</sub> effluxes including fixed and random effects using general linear model.

| Time               | Different effects | Parameter | F-value | P-value |
|--------------------|-------------------|-----------|---------|---------|
| 24–25 July 2011    | Fixed effect      | 2-hour    | 22.15   | 0       |
|                    | Random effect     | Site      | 1.44    | 0.26    |
| 5–6 September 2012 | Fixed effect      | 2-hour    | 16.73   | 0       |
|                    | Random effect     | Site      | 0.33    | 0.72    |
| 13–14 January 2013 | Fixed effect      | 2-hour    | 102.69  | 0       |
|                    | Random effect     | Site      | 0.92    | 0.45    |
| 14–15 January 2015 | Fixed effect      | 2-hour    | 141.99  | 0       |
|                    | Random effect     | Site      | 1.35    | 0.28    |

**Note:** 2-hour means that we measured CH<sub>4</sub> efflux every 2 h from 8:00 am to 8:00 am the next day.

Table S4 Interactions among environmental variables

|                               | ST      | WL      | SNO <sub>3</sub> <sup>-</sup> | SNC    | WNO <sub>3</sub> <sup>-</sup> | TN    | TP    |
|-------------------------------|---------|---------|-------------------------------|--------|-------------------------------|-------|-------|
| WL                            | 0.80**  |         |                               |        |                               |       |       |
| WNH <sub>4</sub> <sup>+</sup> | -0.60** | -0.34*  |                               |        |                               |       |       |
| TN                            | -0.52** | -0.45** |                               |        | 0.43**                        |       |       |
| SNH <sub>4</sub> <sup>+</sup> |         | -0.55** |                               |        |                               |       |       |
| C/N                           |         |         | 0.48**                        |        |                               |       |       |
| WNO <sub>3</sub> <sup>-</sup> |         |         | 0.32*                         |        |                               |       |       |
| SOC                           |         |         |                               | 0.87** |                               |       |       |
| COD                           |         |         |                               |        |                               | 0.39* | 0.31* |

**Note:** ST, sediment temperature; WL, water level; SNO<sub>3</sub><sup>-</sup>, the sediment NO<sub>3</sub><sup>-</sup> concentration; SNH<sub>4</sub><sup>+</sup>, sediment NH<sub>4</sub><sup>+</sup> concentration; WNH<sub>4</sub><sup>+</sup>, water NH<sub>4</sub><sup>+</sup> concentration; WNO<sub>3</sub><sup>-</sup>, water NO<sub>3</sub><sup>-</sup> concentration; C/N, sediment C/N ratio; SOC, soil organic carbon; COD, chemical oxygen demand in the water; TN, total nitrogen concentration in the water; TP, total phosphorous content in the water; SNC, the sediment total nitrogen content.

Table S5 Multivariate regressions between seasonal CH<sub>4</sub> efflux and environmental factors at each individual site

| Site   | No.                         | Number of variables | Regression Equation                                                   | n  | R <sup>2</sup> | p     |
|--------|-----------------------------|---------------------|-----------------------------------------------------------------------|----|----------------|-------|
| Site A | Group 1                     | 12                  | EffluxCH <sub>4</sub> = -8.32 + 0.57 ST + 63.12SNC                    | 48 | 0.67           | 0.006 |
|        | Group1 + Group 2            | 16                  | EffluxCH <sub>4</sub> = -13.27 + 0.59ST + 93.24SNC                    | 43 | 0.71           | 0     |
|        | Group 1 + Group 2 + Group 3 | 19                  | EffluxCH <sub>4</sub> = -4.05 + 0.58ST + 112.25SNC - 36.48TP - 0.75DO | 19 | 0.88           | 0     |
| Site B | Group 1                     | 12                  | EffluxCH <sub>4</sub> = -11.15 + 0.56ST + 63.14SNC                    | 48 | 0.63           | 0.002 |
|        | Group1 + Group 2            | 16                  | EffluxCH <sub>4</sub> = -10.45 + 0.58ST + 95.23SNC                    | 43 | 0.75           | 0     |
|        | Group 1 + Group 2 + Group 3 | 19                  | EffluxCH <sub>4</sub> = -3.68 + 0.57ST + 106.46SNC - 34.23TP - 0.72DO | 19 | 0.91           | 0     |
| Site C | Group 1                     | 12                  | EffluxCH <sub>4</sub> = -9.17 + 0.58 ST + 64.11SNC                    | 48 | 0.66           | 0.008 |
|        | Group1 + Group 2            | 16                  | EffluxCH <sub>4</sub> = -11.25 + 0.59ST + 94.37SNC                    | 43 | 0.76           | 0     |
|        | Group 1 + Group 2 + Group 3 | 19                  | EffluxCH <sub>4</sub> = -3.77 + 0.57ST + 107.15SNC - 34.23TP - 0.72DO | 19 | 0.9            | 0     |

**Note:** Variables in group 1 included sediment temperature (ST), sediment total nitrogen content (SNC), water level, DOC content in the water, pH in the sediment, NH<sub>4</sub><sup>+</sup> and NO<sub>3</sub><sup>-</sup> concentrations in the water and in the sediment, sediment organic carbon content, the ratio of carbon and nitrogen, and the mean daily wind speed. Variables in group 2 included TN, TP, COD, and Chl *a* contents in the water. Variables in group 3 included DO content, conductivity, and pH in the water.
